# Supplementary material for: Association of longitudinal pet ownership with wheezing in 3-year-old children using the distributed lag model: the Japan Environment and Children’s Study
Source: PubMed Central journal article supplement (PMC11155167; doi:10.1186/s12940-024-01087-x), 2024-06-06
Supplement: 12940_2024_1087_MOESM1_ESM.pdf [file 12940_2024_1087_MOESM1_ESM.pdf]

Association of Longitudinal Pet Ownership with Wheezing in 3-Year-Old Children

Using the Distributed Lag Model: The Japan Environment and Children's Study

**Web Appendix**

Appendix 1. Details of JECS data analysis.

**Web Tables**

Table. A1: Variables used for covariates.

| Variables                                                         | Questionnaire timing | Category / Additional information                                                                  |
|-------------------------------------------------------------------|----------------------|----------------------------------------------------------------------------------------------------|
| Previous delivery                                                 | at study enrollment  | Yes, no                                                                                            |
| Weeks of pregnancy at delivery                                    | at delivery          | premature birth (22-36 weeks), full-term birth (37-41 weeks), others                               |
| Planned/emergent cesarean delivery                                | at delivery          | Yes, no                                                                                            |
| Weight at birth                                                   | at delivery          | < 2,500 g, ≥ 2,500 g                                                                               |
| Child's sex at birth                                              | at delivery          | male, female                                                                                       |
| Annual household income                                           | mid-pregnancy        | < 4, ≥ 4 – 6, ≥ 6 million JPY                                                                      |
| Frequency of cleaning the living room floor with a vacuum cleaner | mid-pregnancy        | average throughout the year; categorized as every day, once a week and more, less than once a week |
| Frequency of cleaning the bedroom floor with a vacuum cleaner     | mid-pregnancy        | average throughout the year; categorized as every day, once a week and more, less than once a week |
| Family members' smoking after the baby                            | 1 month old          | No one smoked (no smoking), Somebody smoked but not in the presence of the baby                    |

was born within 1 month of birth (smoking in the absence of babies),  
 Somebody smoked in the presence of the baby (smoking in the presence of the baby)

Mother's allergy and ear-nose-throat disease at study enrollment  
 Has the mother ever been diagnosed with bronchial asthma by a physician from birth to the time of study enrollment ?  
 (yes, no)

Study Areas 3 years old  
 Names of currently managed regions (organizations)  
 (Hokkaido, Miyagi, Fukushima, Chiba, Kanagawa, Koshin (Yamanashi , Shinshu), Toyama, Aichi, Kyoto (Kyoto , Doshisha), Osaka, Hyogo, Tottori, Kochi, Fukuoka (Occupational and Environmental Health , Kyushu), South Kyushu/Okinawa (Kumamoto , Miyazaki , Ryukyu)

Table. A2: Changes in pet keeping.

|               |     | 6 months old pet keeping |              |        | 1.5 years old pet keeping |              |        |
|---------------|-----|--------------------------|--------------|--------|---------------------------|--------------|--------|
|               |     | Yes<br>people            | No<br>people | Sum    | Yes<br>people             | No<br>people | Sum    |
| Mid Pregnancy | Yes | 8,364                    | 937          | 9,301  | 6,847                     | 2,454        | 9,301  |
| pet keeping   | No  | 2,763                    | 52,775       | 55,538 | 1,252                     | 54,286       | 55,538 |
|               | Sum |                          |              | 64,839 |                           |              | 64,839 |
| 6 months old  | Yes |                          |              |        | 7,316                     | 3,811        | 11,127 |
| pet keeping   | No  |                          |              |        | 783                       | 52,929       | 53,712 |
|               | Sum |                          |              |        |                           |              | 64,839 |

Web Figures

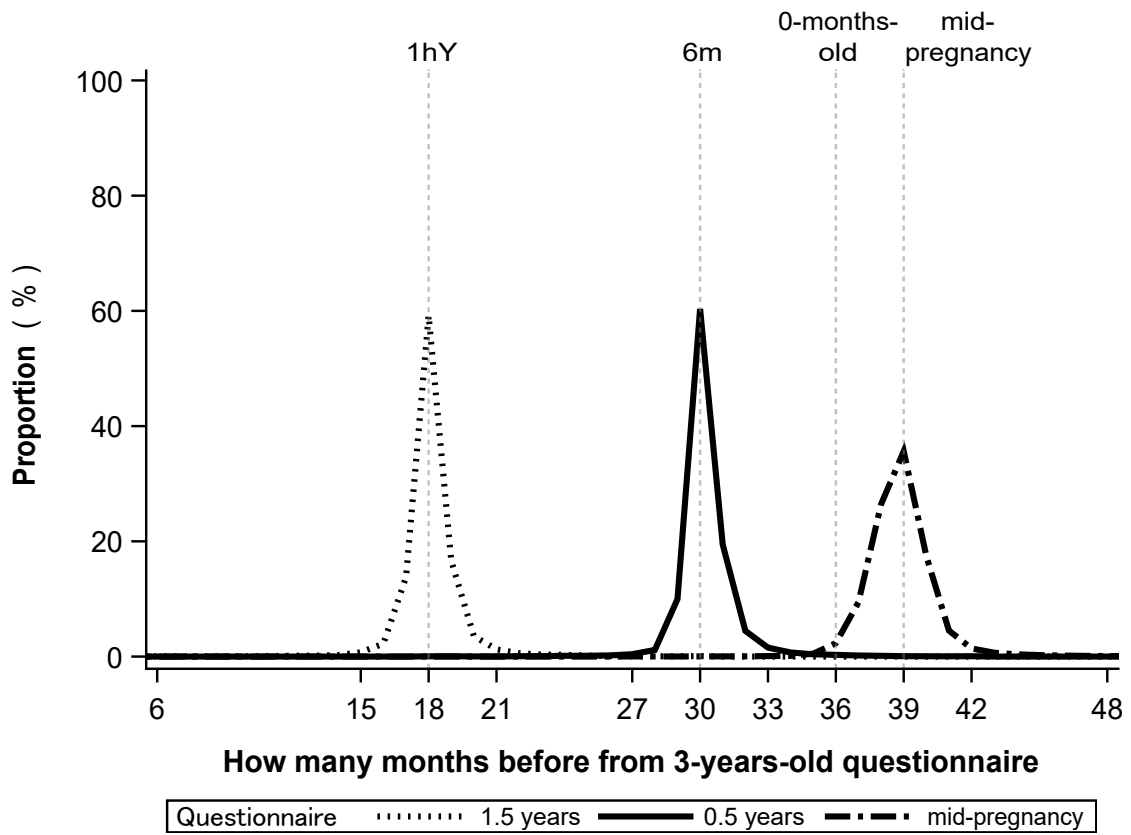

Figure. A1 : Distribution of questionnaire response time.

The x-axis indicates the number of months before the 3-year-old questionnaire.

Appendix 2. Details of Simulation Experiment.

Box-and-whisker plots of the estimation results by simulation experiment for each scenario and each model are shown in Figures B1-B3 for each of the three time points at  $t=36, 42,$  and  $48,$  for each value of  $\gamma.$  The box plots show that the Single Model has a large bias in the estimation and that the Multi Model captures the true values on average, but the variability of the estimates is larger than in the other models when the correlation between exposures is large.

**Web Tables**

Table. B1: Time point settings used in the simulation experiments.

| <b>Time point</b> | <b>Range of time point distribution <math>t_{ki}</math></b> | <b>Probability distribution of time point</b>                                                                                                   |
|-------------------|-------------------------------------------------------------|-------------------------------------------------------------------------------------------------------------------------------------------------|
| $t_{1i}$          | $4 \leq t_{1i} \leq 9$                                      | $p(t_{1i} = 4) = 0.10, p(t_{1i} = 5) = 0.15, p(t_{1i} = 6) = 0.45,$<br>$p(t_{1i} = 7) = 0.15, p(t_{1i} = 8) = 0.10, p(t_{1i} = 9) = 0.05$       |
| $t_{2i}$          | $10 \leq t_{2i} \leq 15$                                    | $p(t_{2i} = 10) = 0.10, p(t_{2i} = 11) = 0.15, p(t_{2i} = 12) = 0.45,$<br>$p(t_{2i} = 13) = 0.15, p(t_{2i} = 14) = 0.10, p(t_{2i} = 15) = 0.05$ |
| $t_{3i}$          | $16 \leq t_{3i} \leq 21$                                    | $p(t_{3i} = 16) = 0.10, p(t_{3i} = 17) = 0.15, p(t_{3i} = 18) = 0.45,$<br>$p(t_{3i} = 19) = 0.15, p(t_{3i} = 20) = 0.10, p(t_{3i} = 21) = 0.05$ |
| $t_{4i}$          | $22 \leq t_{4i} \leq 27$                                    | $p(t_{4i} = 22) = 0.10, p(t_{4i} = 23) = 0.15, p(t_{4i} = 24) = 0.45,$<br>$p(t_{4i} = 25) = 0.15, p(t_{4i} = 26) = 0.10, p(t_{4i} = 27) = 0.05$ |
| $t_{5i}$          | $28 \leq t_{5i} \leq 33$                                    | $p(t_{5i} = 28) = 0.10, p(t_{5i} = 29) = 0.15, p(t_{5i} = 30) = 0.45,$<br>$p(t_{5i} = 31) = 0.15, p(t_{5i} = 32) = 0.10, p(t_{5i} = 33) = 0.05$ |
| $t_{6i}$          | $34 \leq t_{6i} \leq 39$                                    | $p(t_{6i} = 34) = 0.10, p(t_{6i} = 35) = 0.15, p(t_{6i} = 36) = 0.45,$<br>$p(t_{6i} = 37) = 0.15, p(t_{6i} = 38) = 0.10, p(t_{6i} = 39) = 0.05$ |
| $t_{7i}$          | $40 \leq t_{7i} \leq 45$                                    | $p(t_{7i} = 40) = 0.10, p(t_{7i} = 41) = 0.15, p(t_{7i} = 42) = 0.45,$<br>$p(t_{7i} = 43) = 0.15, p(t_{7i} = 44) = 0.10, p(t_{7i} = 45) = 0.05$ |
| $t_{8i}$          | $46 \leq t_{8i} \leq 51$                                    | $p(t_{8i} = 46) = 0.10, p(t_{8i} = 47) = 0.15, p(t_{8i} = 48) = 0.45,$                                                                          |

|           |                           |                                                                                                                                                       |
|-----------|---------------------------|-------------------------------------------------------------------------------------------------------------------------------------------------------|
|           |                           | $p(t_{8i} = 49) = 0.15, p(t_{8i} = 50) = 0.10, p(t_{8i} = 51) = 0.05$                                                                                 |
| $t_{9i}$  | $52 \leq t_{9i} \leq 57$  | $p(t_{9i} = 52) = 0.10, p(t_{9i} = 53) = 0.15, p(t_{9i} = 54) = 0.45,$<br>$p(t_{9i} = 55) = 0.15, p(t_{9i} = 56) = 0.10, p(t_{9i} = 57) = 0.05$       |
| $t_{10i}$ | $58 \leq t_{10i} \leq 63$ | $p(t_{10i} = 58) = 0.10, p(t_{10i} = 59) = 0.15, p(t_{10i} = 60) = 0.45,$<br>$p(t_{10i} = 61) = 0.15, p(t_{10i} = 62) = 0.10, p(t_{10i} = 63) = 0.05$ |

### Web Figures

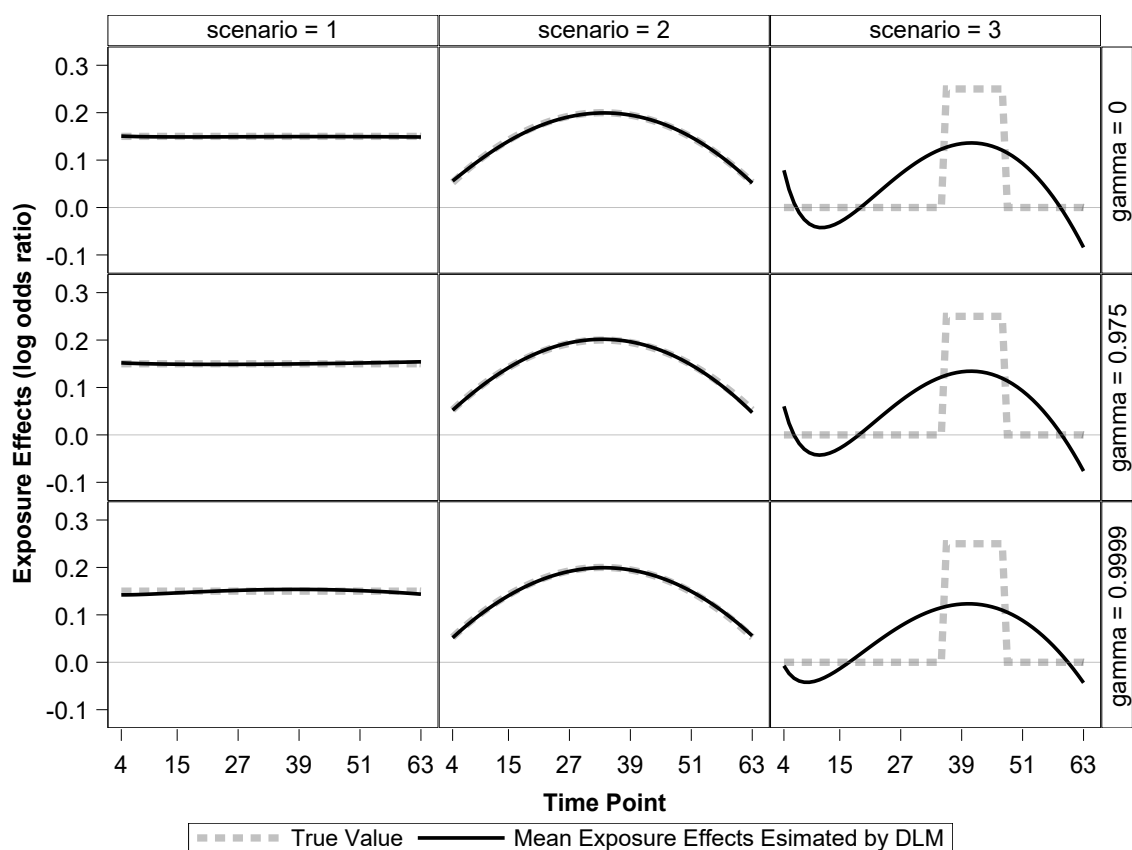

Figure. B1: Mean exposure effects by DLM per scenario and correlation coefficient ( $\gamma$ ).

The gray dotted line: the true value. The black line: the DLM average. The gray line: reference line for  $\beta=0$ . Scenarios 1, 2, and 3 in order from left to right. Upper panel  $\gamma=0$ , middle panel  $\gamma=0.975$ , lower panel  $\gamma=0.9999$ .

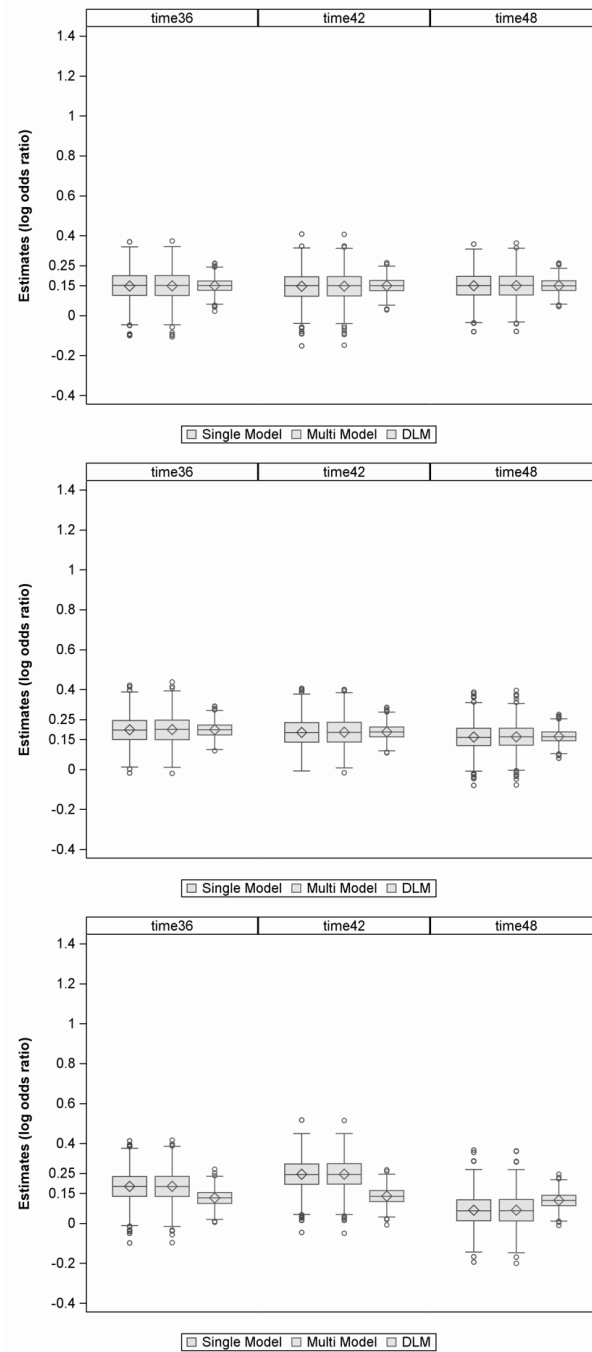

Figure. B2: Distribution of point estimates of exposure effects for scenarios 1-3 ( $\gamma=0$ ).

Box-and-whisker plots for time=36,42,48 from left to right. Within each time, from left to right: Single model, Multi model, DLM. Scenarios 1, 2, and 3 from top to bottom.

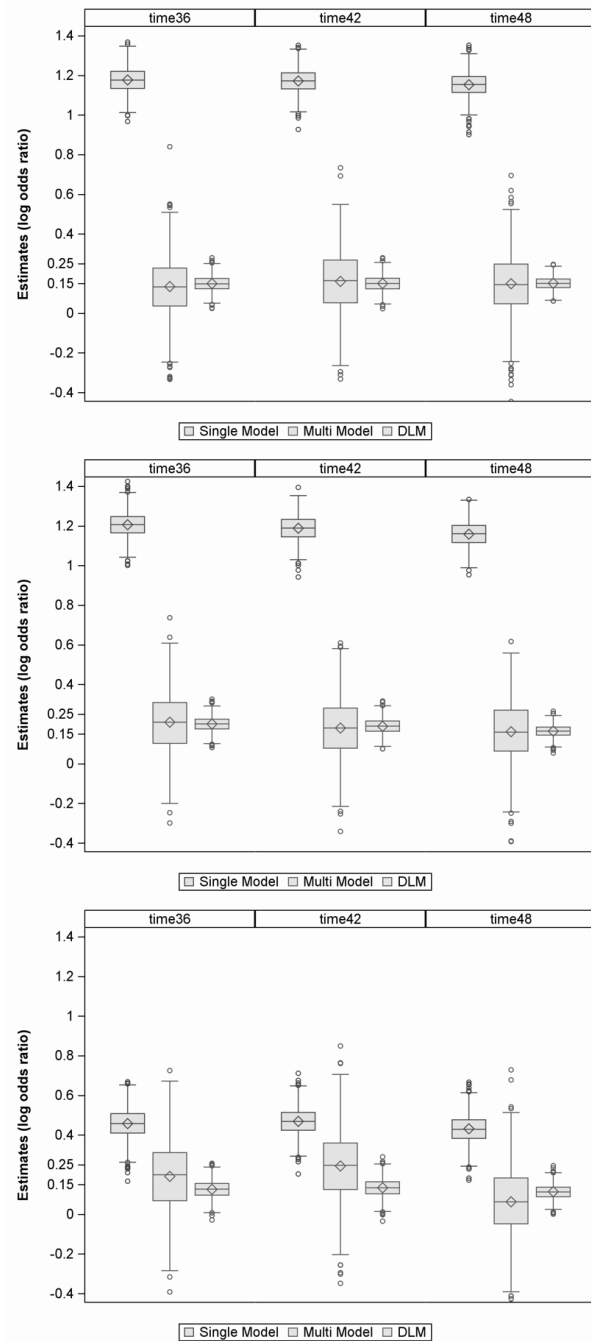

Figure. B3: Distribution of point estimates of exposure effects for scenarios 1-3 ( $\gamma=0.975$ ).

Box-and-whisker plots for time=36,42,48 from left to right. Within each time, from left to right: Single model,

Multi model, DLM. Scenarios 1, 2, and 3 from top to bottom.

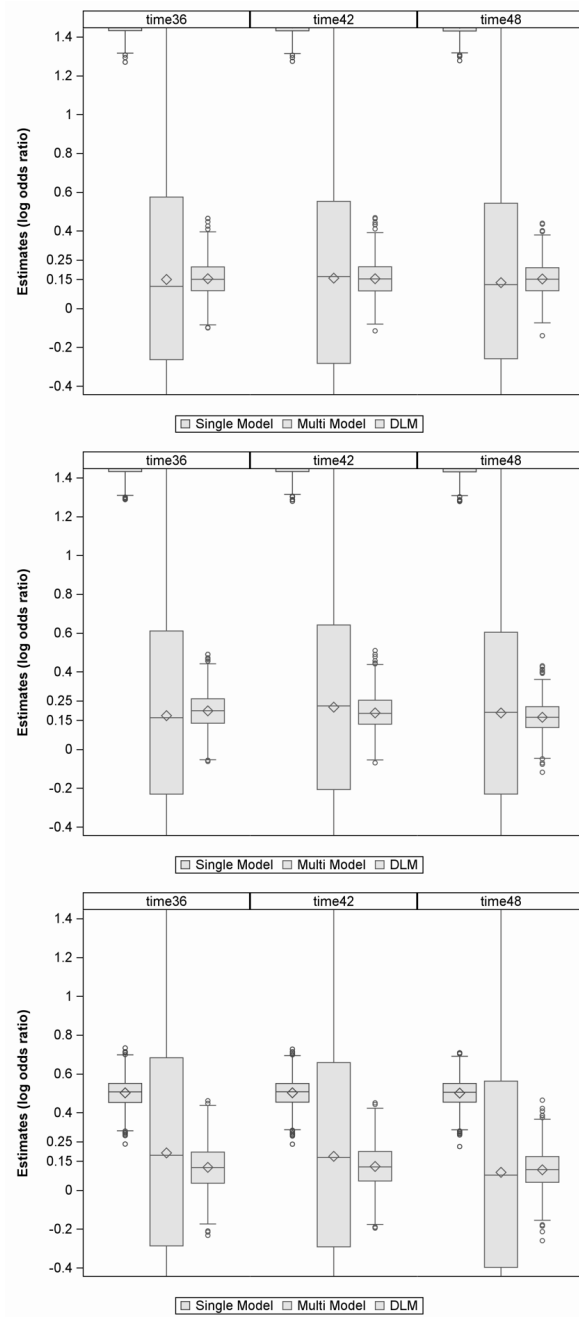

Figure. B4: Distribution of point estimates of exposure effects for scenarios 1-3 ( $\gamma=0.9999$ ).

Box-and-whisker plots for time=36,42,48 from left to right. Within each time, from left to right: Single model, Multi model, DLM. Scenarios 1, 2, and 3 from top to bottom.



### Appendix 3. Members of the JECS Group as of 2022:

Michihiro Kamijima (principal investigator, Nagoya City University, Nagoya, Japan), Shin Yamazaki (National Institute for Environmental Studies, Tsukuba, Japan), Yukihiro Ohya (National Center for Child Health and Development, Tokyo, Japan), Reiko Kishi (Hokkaido University, Sapporo, Japan), Nobuo Yaegashi (Tohoku University, Sendai, Japan), Koichi Hashimoto (Fukushima Medical University, Fukushima, Japan), Chisato Mori (Chiba University, Chiba, Japan), Shuichi Ito (Yokohama City University, Yokohama, Japan), Zentaro Yamagata (University of Yamanashi, Chuo, Japan), Hidekuni Inadera (University of Toyama, Toyama, Japan), Takeo Nakayama (Kyoto University, Kyoto, Japan), Tomotaka Sobue (Osaka University, Suita, Japan), Masayuki Shima (Hyogo Medical University, Nishinomiya, Japan), Hiroshige Nakamura (Tottori University, Yonago, Japan), Narufumi Suganuma (Kochi University, Nankoku, Japan), Koichi Kusuhara (University of Occupational and Environmental Health, Kitakyushu, Japan), and Takahiko Katoh (Kumamoto University, Kumamoto, Japan).
